# Supplementary material for: Multiple Antenatal Dexamethasone Treatment Alters Brain Vessel Differentiation in Newborn Mouse Pups
Source: PubMed Central journal article supplement (PMC4537167; doi:10.1371/journal.pone.0136221), 2015-08-14

**S3 Fig.:** Effects of maternal DEX-treatment on receptor and transporter expression in total brains as well as brain endothelial fractions of PN10 pups. Data are presented as means  $\pm$  SEM; for mRNA data: n = 5-6 biological samples, at PN10 one brain represented one biological sample; for western blotting: n = 6, at PN10 one brain represented one biological sample. Biological samples were collected from at least three different litters; \$: p<0.05 (two-tailed Student's t-test). GR = glucocorticoid receptor; NR1 = NR1 subunit of N-methyl-D-aspartate receptor; Abcb1a = ABC-transporter b1a (=P-glycoprotein); Abcg2 = ABC-transporter g2 (=bcrp); Abcc4 = ABC-transporter c4 (=Mrp4); Glut1 = glucose transporter 1 (=Slc2a1), Mct1 = monocarboxylic acid transporter 1 (=Slc16a1).

Postnatal day 10

| Total brain – mRNA expression             |                  |                               |                 |                               |
|-------------------------------------------|------------------|-------------------------------|-----------------|-------------------------------|
| target                                    | 1x NaCl          | 1x DEX                        | 3x NaCl         | 3x DEX                        |
| <b>receptors</b>                          |                  |                               |                 |                               |
| GR                                        | 1.00 $\pm$ 0.03  | 0.93 $\pm$ 0.04               | 1.00 $\pm$ 0.02 | 0.71 $\pm$ 0.24               |
| NR1                                       | 1.00 $\pm$ 0.06  | 1.07 $\pm$ 0.09               | 1.00 $\pm$ 0.03 | 0.75 $\pm$ 0.28               |
| <b>transporters</b>                       |                  |                               |                 |                               |
| Abcb1a                                    | 1.00 $\pm$ 0.02  | 0.92 $\pm$ 0.11               | 1.00 $\pm$ 0.02 | 0.60 $\pm$ 0.11 <sup>\$</sup> |
| Abcg2                                     | 1.00 $\pm$ 0.01  | 0.92 $\pm$ 0.02 <sup>\$</sup> | 1.00 $\pm$ 0.02 | 0.72 $\pm$ 0.23               |
| Abcc4                                     | 1.00 $\pm$ 0.05  | 1.32 $\pm$ 0.22               | 1.00 $\pm$ 0.03 | 0.65 $\pm$ 0.19               |
| Glut1                                     | 1.00 $\pm$ 0.09  | 0.99 $\pm$ 0.09               | 1.00 $\pm$ 0.03 | 0.67 $\pm$ 0.19               |
| Mct1                                      | 1.00 $\pm$ 0.001 | 0.96 $\pm$ 0.06               | 1.00 $\pm$ 0.04 | 0.62 $\pm$ 0.19               |
| Total brain – protein expression          |                  |                               |                 |                               |
| target                                    | 1x NaCl          | 1x DEX                        | 3x NaCl         | 3x DEX                        |
| <b>receptors</b>                          |                  |                               |                 |                               |
| GR                                        | 1.00 $\pm$ 0.14  | 0.90 $\pm$ 0.16               | 1.00 $\pm$ 0.07 | 1.00 $\pm$ 0.06               |
| NR1                                       | 1.00 $\pm$ 0.09  | 0.84 $\pm$ 0.07               | 1.00 $\pm$ 0.06 | 0.69 $\pm$ 0.04 <sup>\$</sup> |
| <b>transporters</b>                       |                  |                               |                 |                               |
| Abcg2                                     | 1.00 $\pm$ 0.07  | 0.95 $\pm$ 0.16               | 1.00 $\pm$ 0.25 | 0.80 $\pm$ 0.13               |
| Glut1                                     | 1.00 $\pm$ 0.04  | 0.99 $\pm$ 0.09               | 1.00 $\pm$ 0.06 | 0.75 $\pm$ 0.03 <sup>\$</sup> |
| Brain endothelial cells – mRNA expression |                  |                               |                 |                               |
| target                                    | 1x NaCl          | 1x DEX                        | 3x NaCl         | 3x DEX                        |
| <b>receptors</b>                          |                  |                               |                 |                               |
| GR                                        | 1.00 $\pm$ 0.11  | 0.94 $\pm$ 0.15               | 1.00 $\pm$ 0.04 | 0.65 $\pm$ 0.19               |
| NR1                                       | 1.00 $\pm$ 0.01  | 0.86 $\pm$ 0.13               | 1.00 $\pm$ 0.05 | 0.61 $\pm$ 0.22               |
| <b>transporters</b>                       |                  |                               |                 |                               |
| Abcb1a                                    | 1.00 $\pm$ 0.14  | 0.88 $\pm$ 0.33               | 1.00 $\pm$ 0.07 | 0.72 $\pm$ 0.26               |
| Abcg2                                     | 1.00 $\pm$ 0.11  | 0.71 $\pm$ 0.09               | 1.00 $\pm$ 0.03 | 0.73 $\pm$ 0.26               |
| Abcc4                                     | 1.00 $\pm$ 0.15  | 1.05 $\pm$ 0.22               | 1.00 $\pm$ 0.08 | 0.49 $\pm$ 0.14 <sup>\$</sup> |
| Glut1                                     | 1.00 $\pm$ 0.18  | 0.68 $\pm$ 0.16               | 1.00 $\pm$ 0.04 | 0.77 $\pm$ 0.27               |
| Mct1                                      | 1.00 $\pm$ 0.14  | 0.73 $\pm$ 0.16               | 1.00 $\pm$ 0.08 | 0.72 $\pm$ 0.25               |

**western blots of total brain samples:**

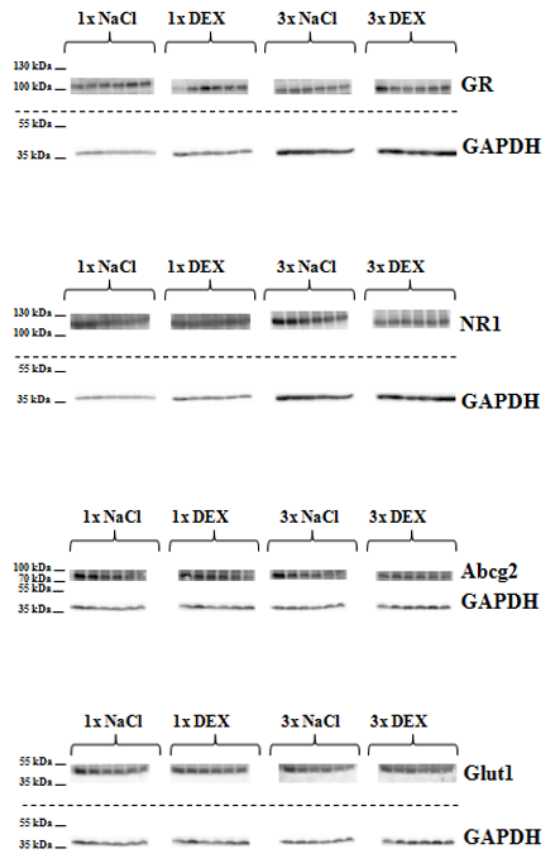

Supplement: pone.0136221.s004.pdf [file pone.0136221.s004.pdf]
