# Supplementary material for: Multiple Antenatal Dexamethasone Treatment Alters Brain Vessel Differentiation in Newborn Mouse Pups
Source: PubMed Central journal article supplement (PMC4537167; doi:10.1371/journal.pone.0136221), 2015-08-14
Supplement: pone.0136221.s005.pdf [file pone.0136221.s005.pdf]

**S1 Table:** List of Taqman-probes used for qPCR

| Target          | Taqman <sup>®</sup> probe identification number |
|-----------------|-------------------------------------------------|
| 18SrRNA         | EUK18SrRNA, 4352930-0810022                     |
| Abcb1a          | Mm00440761_m1                                   |
| Abcc4           | Mm01226380_m1                                   |
| Abcg2           | Mm00496364_m1                                   |
| Angiopoietin-1  | Mm00456503_m1                                   |
| Angiopoietin-2  | Mm00545822_m1                                   |
| Axin-2          | Mm00443610_m1                                   |
| $\beta$ -actin  | Mm01205647_g1                                   |
| Claudin-3       | Mm00515499_s1                                   |
| Claudin-5       | Mm00727012_s1                                   |
| Eno2            | Mm00469062_m1                                   |
| GAPDH           | Mm99999915_g1                                   |
| GFAP            | Mm01253033_m1                                   |
| Glut-1 (Slc2a1) | Mm01192270_m1                                   |
| GR (Nr3c1)      | Mm00433832_m1                                   |
| Grin1 (NR1)     | Mm00433800_m1                                   |
| Kdr (VEGFR2)    | Mm00440099_m1                                   |
| Mct1 (Slc16a1)  | Mm00436566_m1                                   |
| Neuropilin-1    | Mm00435379_m1                                   |
| Occludin        | Mm00500912_m1                                   |
| PDGFRb          | Mm00435546_m1                                   |
| Pecam-1         | Mm01242584_m1                                   |
| PTCH1           | Mm00436026_m1                                   |
| Shh             | Mm00436528_m1                                   |
| Sox-18          | Mm00656049_gH                                   |
| Tek (Tie-2)     | Mm00443243_m1                                   |
| Tjp1 (ZO-1)     | Mm01320637_m1                                   |
| Vegfa           | Mm01281449_m1                                   |
