# Supplementary material for: Multiple Antenatal Dexamethasone Treatment Alters Brain Vessel Differentiation in Newborn Mouse Pups
Source: PubMed Central journal article supplement (PMC4537167; doi:10.1371/journal.pone.0136221), 2015-08-14
Supplement: pone.0136221.s006.pdf [file pone.0136221.s006.pdf]

**S2 Table:** List of antibodies used for western blotting and immunofluorescence microscopy

| Target                          | Product number, Company                  | Species | Application dilution       |
|---------------------------------|------------------------------------------|---------|----------------------------|
| Abcg2                           | ab24115 (BXP53), Abcam                   | rat     | 1:100 for WB               |
| Claudin-3                       | 34-1700, Zymed <sup>®</sup> , Invitrogen | rabbit  | 1:100 for WB               |
| Claudin-5                       | 34-1600, Zymed <sup>®</sup> , Invitrogen | rabbit  | 1:200 for IF, 1:200 for WB |
| GADPH                           | MAB374, Millipore                        | mouse   | 1:2000 for WB              |
| Glut-1                          | 07-1401, Millipore                       | rabbit  | 1:100 for WB               |
| GR                              | sc-8992, Santa Cruz                      | rabbit  | 1:200 for WB               |
| Grin 1 (NR1)                    | sc-9058, Santa Cruz                      | rabbit  | 1:100 for WB               |
| Occludin                        | 71-5000, Zymed <sup>®</sup> , Invitrogen | Rabbit  | 1:400 for WB               |
| Pecam-1                         | 553370, BD Pharmingen                    | rat     | 1:100 for IF               |
| ZO-1                            | 40-2300, Zymed <sup>®</sup> , Invitrogen | rabbit  | 1:100 for WB               |
| HRP-anti-mouse                  | LNA931V/AG, GE Healthcare UK Ltd.        |         | 1:5000 for WB              |
| HRP anti-rabbit                 | LNA934V/AG, GE Healthcare UK Ltd         |         | 1:5000 for WB              |
| HRP anti-rat                    | 61-9520, Invitrogen                      |         | 1:5000 for WB              |
| anti-rat IgG Alexa Fluor 488    | A11006, Invitrogen                       | goat    | 1:200 for IF               |
| anti-rabbit IgG Alexa Fluor 568 | A11011, Invitrogen                       | goat    | 1:200 for IF               |

WB = western blotting, IF = immunofluorescence microscopy
