# Supplementary material for: Multiple Antenatal Dexamethasone Treatment Alters Brain Vessel Differentiation in Newborn Mouse Pups
Source: PubMed Central journal article supplement (PMC4537167; doi:10.1371/journal.pone.0136221), 2015-08-14
Supplement: pone.0136221.s007.pdf [file pone.0136221.s007.pdf]

**S3 Table:** Effects of antenatal DEX-treatment on cell marker expression of Pecam-1/CD31 (brain endothelial cells), PDGFRb (pericytes), GFAP (astrocytes), Eno2 (neurons) in total brains as well as brain endothelial fractions of PN4 and PN10 pups.

**Postnatal day 4**

| <b>Total brain – mRNA expression</b>             |              |                          |         |                          |
|--------------------------------------------------|--------------|--------------------------|---------|--------------------------|
| target                                           | 1x NaCl      | 1x DEX                   | 3x NaCl | 3x DEX                   |
| Pecam-1                                          | 1.00 ± 0.16  | 1.14 ± 0.34              | 1 ± 0   | 0.48 ± 0.13 <sup>§</sup> |
| PDGFRb                                           | 1.00 ± 0.14  | 1.10 ± 0.28              | 1 ± 0   | 0.59 ± 0.22              |
| GFAP                                             | 1.00 ± 0.004 | 1.09 ± 0.14              | 1 ± 0   | 0.60 ± 0.19              |
| Eno2                                             | 1.00 ± 0.01  | 1.29 ± 0.26              | 1 ± 0   | 0.55 ± 0.16 <sup>§</sup> |
| <b>Brain endothelial cells – mRNA expression</b> |              |                          |         |                          |
| target                                           | 1x NaCl      | 1x DEX                   | 3x NaCl | 3x DEX                   |
| Pecam-1                                          | 1.00 ± 0.15  | 1.99 ± 0.56              | 1 ± 0   | 0.50 ± 0.13 <sup>§</sup> |
| PDGFRb                                           | 1.00 ± 0.14  | 1.77 ± 0.28              | 1 ± 0   | 0.50 ± 0.13 <sup>§</sup> |
| GFAP                                             | 1.00 ± 0.02  | 2.25 ± 0.21 <sup>§</sup> | 1 ± 0   | 0.57 ± 0.14              |
| Eno2                                             | 1.00 ± 0.005 | 2.88 ± 0.38 <sup>§</sup> | 1 ± 0   | 0.50 ± 0.10 <sup>§</sup> |

**Postnatal day 10**

| <b>Total brain – mRNA expression</b>             |             |              |              |             |
|--------------------------------------------------|-------------|--------------|--------------|-------------|
| target                                           | 1x NaCl     | 1x DEX       | 3x NaCl      | 3x DEX      |
| Pecam-1                                          | 1.00 ± 0.02 | 1.27 ± 0.27  | 1.00 ± 0.06  | 0.68 ± 0.17 |
| PDGFRb                                           | 1.00 ± 0.01 | 1.04 ± 0.07  | 1.00 ± 0.04  | 0.65 ± 0.18 |
| GFAP                                             | 1.00 ± 0.07 | 0.85 ± 0.06  | 1.00 ± 0.004 | 0.62 ± 0.19 |
| Eno2                                             | 1.00 ± 0.05 | 1.18 ± 0.09  | 1.00 ± 0.02  | 0.72 ± 0.24 |
| <b>Brain endothelial cells – mRNA expression</b> |             |              |              |             |
| target                                           | 1x NaCl     | 1x DEX       | 3x NaCl      | 3x DEX      |
| Pecam-1                                          | 1.00 ± 0.21 | 0.75 ± 0.20  | 1.00 ± 0.06  | 0.86 ± 0.29 |
| PDGFRb                                           | 1.00 ± 0.08 | 0.72 ± 0.06* | 1.00 ± 0.06  | 0.68 ± 0.24 |
| GFAP                                             | 1.00 ± 0.05 | 0.88 ± 0.12  | 1.00 ± 0.04  | 0.75 ± 0.26 |
| Eno2                                             | 1.00 ± 0.18 | 0.93 ± 0.18  | 1.00 ± 0.02  | 0.69 ± 0.26 |

Data are presented as mean ± SEM; n=5-6 biological samples, at PN4 2-3 brains from one litter were pooled to one biological sample, biological samples were collected from at least three different litters; §: p<0.05, \*: p=0.06.
